# Supplementary material
Source: HighWire-hosted journal article supplement (http://thorax.bmj.com/highwire/filestream/174366/field_highwire_adjunct_files/4/Thorax_Table2_136879.doc.docx)
Supplement: Thorax_Table2_136879.doc.docx [file Thorax_Table2_136879.doc.docx]

| Rank  (low to high score) | Pictorial ESS | ESS | Johns |
| --- | --- | --- | --- |
| 1 | Q8 | Q8 | Q6 |
| 2 | Q6 | Q6 | Q8 |
| 3 | Q3 | Q3 | Q3 |
| 4 | Q4 | Q4 | Q2 |
| 5 | Q7 | Q1 | Q7 |
| 6 | Q1 | Q7 | Q1 |
| 7 | Q2 | Q2 | Q4 |
| 8 | Q5 | Q5 | Q5 |

Online supplementary information 3.2i, table 2: Item scores for the pESS and ESS current study and John’s results, ranked in order of lowest to highest item score across the eight questions.
